# Supplementary material
Source: publisher figshare collection journal article supplement (https://acs.figshare.com/ndownloader/files/5716851)
Supplement: Supplementary file 1 [file 5716851]

## SUPPLEMENTARY INFORMATION

### **A new, simple, high affinity glycosidase inhibitor: analysis of binding through x-ray crystallography, mutagenesis and kinetic analysis**

**Spencer J. Williams,<sup>§</sup> Valerie Notenboom,<sup>†</sup> Jacqueline Wicki,<sup>§</sup> David R. Rose<sup>†</sup> and Stephen G. Withers<sup>§,\*</sup>**

<sup>§</sup>*Protein Engineering Network of Centres of Excellence and the Department of Chemistry, University of British Columbia, 2036 Main Mall, Vancouver, Canada, V6T 1Z1*  
E-mail: [withers@chem.ubc.ca](mailto:withers@chem.ubc.ca), phone: (604) 822 3402, fax: (604) 822 2847

<sup>†</sup>*Protein Engineering Network of Centres of Excellence, Ontario Cancer Institute and Department of Medical Biophysics, University of Toronto, Canada, M5G 2M9*

## **Experimental**

### **General**

All melting points are uncorrected. Organic extracts were dried over MgSO<sub>4</sub> and concentrated *in vacuo*. <sup>1</sup>H and <sup>13</sup>C NMR spectra were recorded on Bruker instruments and were referenced using the solvent peak. NMR spectra were in CDCl<sub>3</sub> unless otherwise noted. Flash chromatography was performed on Merck silica gel 60 (a) Still, W.C.; Kahn, M.; Mitra, A.J. *J. Org. Chem.* **1978**, *43*, 2923-2925. Thin layer chromatography was performed on Merck silica gel 60 F<sub>254</sub> plates. Microanalyses were performed by Mr Peter Borda at the University of British Columbia.

-2-

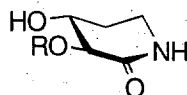

6 R = H  
7 R = Bz

*5-Amino-4,5-dideoxy-2-O-benzoyl-D-threo-pentono-1,5-lactam 7*

A solution of the lactam **6** (222 mg, 1.69 mmol) in dry pyridine (5 ml) was treated with benzoyl chloride (237  $\mu$ L, 2.03 mmol) at  $-40^\circ$  and the solution was allowed to warm to room temperature overnight. The solvent was evaporated and the residue was purified by flash chromatography (80-100% EtOAc/petrol  $\rightarrow$  10% MeOH/EtOAc) to give the monobenzoate **6** as a white solid (269 mg, 68%). A small portion was crystallized to give colorless needles, m.p.  $137-139^\circ$  ( $\text{CHCl}_3/\text{Et}_2\text{O}$ ).  $^1\text{H}$  NMR (400 MHz,  $\text{d}_6$ -DMSO):  $\delta$  1.83-1.95, 2.03-2.12 (2m, H<sub>4,4</sub>), 3.13-3.26 (m, H<sub>5,5</sub>), 4.02-4.11 (m, H<sub>3</sub>), 5.18 (d,  $J_{2,3}$  8.7 Hz, H<sub>2</sub>), 5.49 (d,  $J_{3,\text{OH}}$  4.8 Hz, OH), 7.54-7.74, 8.00-8.05 (2m, Ph), 7.84 (br s, NH).  $^{13}\text{C}$  NMR (75.5 MHz,  $\text{d}_6$ -DMSO)  $\delta$  29.75 (C<sub>4</sub>), 37.32 (C<sub>5</sub>), 66.84 (C<sub>3</sub>), 75.43 (C<sub>2</sub>), 128.71, 129.45, 133.41 (Ph), 165.31 (NCO), 167.21 (PhCO). Anal. calc. for  $\text{C}_{12}\text{H}_{13}\text{NO}_6$ : C, 61.27; H, 5.57; N, 5.95. Found: C, 61.26; H, 5.64; N, 6.02. DCI HRMS ( $\text{NH}_3/\text{CH}_4$ ): calc. for  $m/z$   $[\text{M} + \text{H}]^+$ : 236.0923; found: 236.0922.

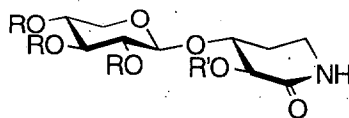

8 R = Ac, R' = Bz  
1 R, R' = H

*3-O-(Tri-O-acetyl- $\beta$ -D-xylopyranosyl)-5-amino-2-O-benzoyl-D-threo-pentono-1,5-lactam 8*

$\text{BF}_3 \cdot \text{Et}_2\text{O}$  (200  $\mu$ L, 1.6 mmol) was added to a solution the alcohol **7** (157 mg, 668  $\mu$ mol) and 2,3,4-tri-O-acetyl- $\alpha$ -D-xylopyranosyl trichloroacetimidate (393 mg, 935  $\mu$ mol) in 1,2-dichloroethane (10 mL) at room temperature under  $\text{N}_2$  and allowed to stand for 2 h. The reaction was quenched by the addition of saturated aqueous  $\text{NaHCO}_3$ , separated, dried ( $\text{MgSO}_4$ ) and the

solvent evaporated. The residue was purified by flash chromatography (80-100% EtOAc/petrol  $\rightarrow$  10% MeOH/EtOAc) to give the disaccharide **8** as a colourless solid (233 mg, 71%). Recrystallization afforded colorless needles, m.p. 147-149° (EtOH/Pr<sup>i</sup><sub>2</sub>O). <sup>1</sup>H NMR (400 MHz):  $\delta$  1.90-2.05, 2.15-2.23 (2m, H4,4), 1.97, 1.99, 2.02 (3s, Ac), 3.24 (dd,  $J_{4',5'}$  6.8,  $J_{5',5''}$  12.2 Hz, H5'), 3.28-3.42 (m, H5,5), 3.90 (dd,  $J_{4',5'}$  4.2 Hz, H5'), 4.28 (ddd,  $J_{2,3}$  7.7,  $J_{3,4}$  3.9, 9.6, Hz, H3), 4.68 (d,  $J_{1',2'}$  5.3 Hz, H1'), 4.73 (ddd,  $J_{3',4'} \approx J_{4',5'}$  6.8,  $J_{4',5'}$  4.3 Hz, H4'), 4.80 (dd,  $J_{2',3'}$  7.0 Hz, H2'), 5.01 (dd, H3'), 5.38 (d, H2), 6.34 (br s, NH), 7.39-8.08 (3m, Ph). <sup>13</sup>C NMR (75.5 MHz)  $\delta$  20.60, 20.68, 20.72 (Me), 26.63 (C4), 37.81 (C5), 60.79 (C5'), 67.94, 69.73, 69.83, 72.81, 74.31 (C2,3,2',3',4'), 98.01 (C1'), 128.40, 129.89, 133.34 (Ph), 165.60 (NCO), 167.71 (PhCO), 169.26, 169.69, 169.89 (MeCO). Anal. calc. for C<sub>23</sub>H<sub>27</sub>NO<sub>11</sub>: C, 55.98; H, 5.51; N, 2.84. Found: C, 55.58; H, 5.41; N, 2.76.

*5-Amino-3-O-( $\beta$ -D-xylopyranosyl)-D-threo-pentono-1,5-lactam 1*

A suspension of the disaccharide **8** (200 mg) in dry MeOH (10 mL) was treated with a small piece of sodium metal and the suspension was stirred overnight. The solution was neutralized with cation exchange resin (IR-120, H<sup>+</sup> form) and the solvent was evaporated. The residue was purified by flash chromatography (17:2:1 EtOAc/MeOH/H<sub>2</sub>O) to give the lactam **1** as a colorless foam (81 mg, 76%). <sup>1</sup>H NMR (400 MHz, D<sub>2</sub>O):  $\delta$  1.84-1.96, 2.16-2.25 (2m, H4,4), 3.20-3.38 (m, 4H, H5,5,2',3'), 3.43 (dd,  $J_{4',5'}$  9.2,  $J_{5',5''}$  11.6 Hz, H5'), 3.61 (ddd,  $J_{3',4'}$  10.4,  $J_{4',5'}$  5.4 Hz, H4'), 3.94 (dd, H5'), 4.01-4.10 (m, H2,3), 4.53 (d,  $J_{1',2'}$  7.8 Hz, H1'). <sup>13</sup>C NMR (75 MHz, D<sub>2</sub>O)  $\delta$  25.27 (C4), 37.77 (C5), 65.41 (C5'), 69.44, 71.13, 73.02, 75.90, 76.86 (C2,3,2',3',4'), 100.92, (C1'), 173.36 (CO). Anal. calc. for C<sub>10</sub>H<sub>17</sub>NO<sub>7</sub>·H<sub>2</sub>O: C, 42.72; H, 6.81; N, 4.98. Found: C, 42.72; H, 6.65; N, 5.00.

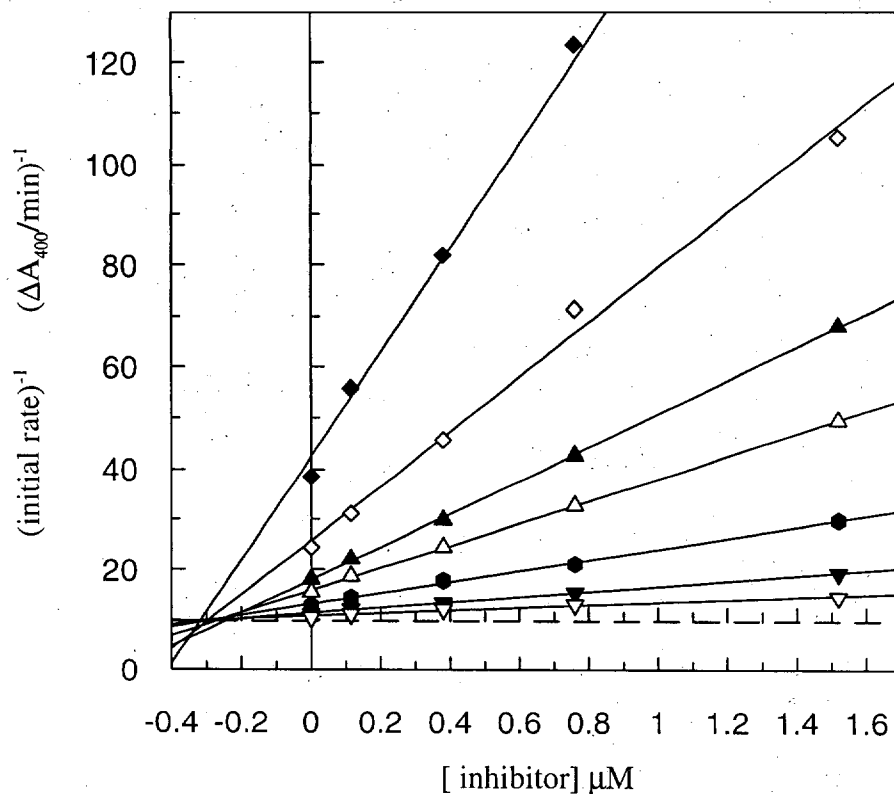

**Figure 1.** Dixon plot of inhibition of *Cellulomonas fimi* xylanase by the xylobiose-derived lactam **1**. The concentrations of the substrate, 2,4-dinitrophenyl  $\beta$ -cellobioside, used were 0.028 (◆), 0.056 (◇), 0.097 (▲), 0.139 (△), 0.278 (●), 0.556 (▼), 1.11 (▽) mM.

### Kinetic Analysis

a) Inhibition of *Cellulomonas fimi* xylanase, Cex. Cex was purified as described previously (a) Gilkes, N.R.; Langford, M.L.; Kilburn, D.G.; Miller, R.C.; Warren, R.A.J. *J. Biol. Chem.* **1984**, 259, 10455-10459. Inhibition constants were determined at 37°C using a 0.05 M  $\text{NaH}_2\text{PO}_4/\text{Na}_2\text{PO}_4$  buffer (pH 7.0) and 2,4-dinitrophenyl  $\beta$ -cellobioside as a substrate. Measurements were started by addition of Cex. Measurements of the increase of absorption at

400 nm per min in a continuous assay yielded reaction rates. This increase was linear during all measurements (1-3 min). Michaelis parameters ( $V_{\max}$  and  $K_m$ ) were extracted from these data by best fit to the Michaelis-Menten equation using the program *Grafit* (b) Leatherbarrow, R.J. *Grafit 4.0*; Erithacus Software: Staines. Estimates of  $K_i$  values were obtained by measuring rates in a series of cells at a fixed substrate concentration in the presence of a range of inhibitor concentrations (6-10 concentrations) which encompassed the  $K_i$  value ultimately determined, generally from  $0.3 K_i$  to  $3 K_i$ . The observed rates were plotted in the form of a Dixon plot and the  $K_i$  value was determined by an intersection of this line with a horizontal line drawn through  $1/V_{\max}$ . Full  $K_i$  determinations were performed by measurement of rates at a series of 7 substrate concentrations (generally from  $0.3 K_i$  to  $3 K_i$ ) in the presence of a range of inhibitor concentrations (typically 5 concentrations) which bracket the  $K_i$  value ultimately determined. Full  $K_i$  determinations were usually within 25% of the estimated  $K_i$  values.  $K_i$  values were calculated from these data by 3-dimensional non-linear regression analysis using the program *Grafit*.

**The generation of the N126A Cex mutant and the kinetic analysis performed with this mutant will be described elsewhere.**
